# Supplementary material for: Percolation of a metallic binder in energy generating composites
Source: Royal Society of Chemistry journal article supplement (doi:10.1039/c7ta00689f), 2017-01-01
Supplement: c7ta00689f1.pdf [file c7ta00689f1.pdf]

## Supplementary Information

### Percolation of a liquid metal binder in energy generating composites

Kelsey Meeks<sup>1,2</sup>, Dylan Smith<sup>1</sup>, Logan Smith<sup>1</sup>, Billy Clark<sup>1</sup>, Michelle L. Pantoya<sup>1</sup>

<sup>1</sup> Mechanical Engineering Department, Texas Tech University, Lubbock, TX 79409-1021

<sup>2</sup> Sandia National Labs, Albuquerque, NM 87185 USA

### Particle Size Distributions

Table S1 Particle size distribution for indium from particle size analyzer.

| Size  | Count | Cumulative | Size  | Count | Cumulative | Size    | Count | Cumulative |
|-------|-------|------------|-------|-------|------------|---------|-------|------------|
| 0.514 | 7     | 7          | 2.38  | 8682  | 126878     | 10.548  | 431   | 204201     |
| 0.542 | 6     | 13         | 2.457 | 7961  | 134839     | 11.133  | 309   | 204510     |
| 0.57  | 7     | 20         | 2.593 | 6126  | 140965     | 11.75   | 249   | 204759     |
| 0.604 | 7     | 27         | 2.737 | 6937  | 147902     | 12.402  | 168   | 204927     |
| 0.67  | 13    | 40         | 2.889 | 5465  | 153367     | 13.09   | 164   | 205091     |
| 0.673 | 11    | 51         | 3.049 | 4746  | 158113     | 13.816  | 104   | 205195     |
| 0.71  | 14    | 65         | 3.218 | 4813  | 162926     | 14.582  | 120   | 205315     |
| 0.749 | 13    | 78         | 3.396 | 4222  | 167148     | 15.39   | 80    | 205395     |
| 0.791 | 17    | 95         | 3.585 | 3404  | 170552     | 12.244  | 62    | 205457     |
| 0.835 | 24    | 119        | 3.783 | 3812  | 174364     | 17.145  | 42    | 205499     |
| 0.881 | 23    | 142        | 3.993 | 3651  | 178015     | 18.095  | 40    | 205539     |
| 0.93  | 27    | 169        | 4.215 | 2634  | 180649     | 19.099  | 36    | 205575     |
| 0.982 | 32    | 201        | 4.448 | 3043  | 183692     | 20.158  | 32    | 205607     |
| 1.036 | 33    | 234        | 4.695 | 2307  | 185999     | 21.275  | 19    | 205626     |
| 1.093 | 48    | 282        | 4.955 | 2278  | 188277     | 22.455  | 11    | 205637     |
| 1.154 | 55    | 337        | 5.23  | 2324  | 190601     | 23.7    | 12    | 205649     |
| 1.218 | 94    | 431        | 5.52  | 1707  | 192308     | 25.014  | 9     | 205658     |
| 1.286 | 268   | 699        | 5.826 | 1882  | 194190     | 26.401  | 3     | 205661     |
| 1.357 | 1221  | 1920       | 6.149 | 1422  | 195612     | 27.865  | 6     | 205667     |
| 1.432 | 7303  | 9223       | 6.49  | 1572  | 197184     | 29.401  | 2     | 205669     |
| 1.512 | 18113 | 27336      | 9.85  | 1155  | 198339     | 32.762  | 4     | 205673     |
| 1.595 | 16758 | 44094      | 7.23  | 1181  | 199520     | 36.497  | 1     | 205674     |
| 1.684 | 15429 | 59523      | 7.631 | 1066  | 200586     | 40.656  | 1     | 205675     |
| 1.777 | 15043 | 74566      | 8.054 | 756   | 201342     | 42.911  | 1     | 205676     |
| 1.876 | 12417 | 86983      | 8.5   | 814   | 202156     | 45.29   | 3     | 205679     |
| 1.98  | 12368 | 99351      | 8.972 | 648   | 202804     | 47.801  | 1     | 205680     |
| 2.09  | 9900  | 109251     | 9.469 | 521   | 203325     | 56.202  | 2     | 205682     |
| 2.205 | 8945  | 118196     | 9.994 | 445   | 203770     | 133.276 | 1     | 205683     |

Table S2 Particle size distribution for manganese dioxide from particle size analyzer.

| Size  | Count | Cumulative | Size   | Count | Cumulative | Size    | Count | Cumulative |
|-------|-------|------------|--------|-------|------------|---------|-------|------------|
| 0.514 | 42    | 42         | 2.737  | 22535 | 247369     | 14.582  | 91    | 674564     |
| 0.542 | 41    | 83         | 2.889  | 20450 | 267819     | 15.39   | 56    | 674620     |
| 0.52  | 76    | 159        | 3.049  | 20179 | 287998     | 16.244  | 32    | 674652     |
| 0.604 | 73    | 232        | 3.218  | 21561 | 309559     | 17.145  | 19    | 674671     |
| 0.637 | 118   | 350        | 3.396  | 20541 | 330100     | 18.095  | 21    | 674692     |
| 0.673 | 100   | 450        | 3.585  | 18493 | 348593     | 19.099  | 14    | 674706     |
| 0.71  | 144   | 594        | 3.783  | 22860 | 371453     | 21.158  | 13    | 674719     |
| 0.749 | 181   | 775        | 3.993  | 23200 | 394653     | 21.275  | 19    | 674738     |
| 0.791 | 170   | 945        | 4.215  | 19048 | 413701     | 22.455  | 21    | 674759     |
| 0.835 | 195   | 1140       | 4.448  | 23449 | 437150     | 23.7    | 14    | 674773     |
| 0.881 | 195   | 1335       | 4.695  | 20042 | 457192     | 25.014  | 15    | 674788     |
| 0.93  | 220   | 1555       | 4.955  | 19761 | 476953     | 26.401  | 8     | 674796     |
| 0.98  | 298   | 1853       | 5.23   | 23657 | 500610     | 27.865  | 3     | 674799     |
| 1.036 | 339   | 2192       | 5.52   | 18704 | 519314     | 29.41   | 13    | 674812     |
| 1.093 | 420   | 2612       | 5.826  | 22471 | 541785     | 31.041  | 9     | 674821     |
| 1.154 | 635   | 3247       | 6.149  | 17984 | 559769     | 34.579  | 3     | 674824     |
| 1.18  | 804   | 4051       | 6.49   | 20359 | 580128     | 36.497  | 3     | 674827     |
| 1.286 | 1753  | 5804       | 6.85   | 15540 | 595668     | 38.52   | 4     | 674831     |
| 1.35  | 3323  | 9127       | 7.23   | 16596 | 612264     | 40.656  | 2     | 674833     |
| 1.432 | 7783  | 16910      | 7.631  | 14731 | 626995     | 42.911  | 3     | 674836     |
| 1.512 | 14460 | 31370      | 8.054  | 10791 | 637786     | 45.29   | 2     | 674838     |
| 1.595 | 15889 | 47259      | 8.5    | 10422 | 648208     | 47.801  | 1     | 674839     |
| 1.684 | 17373 | 64632      | 8.972  | 8118  | 656326     | 50.452  | 2     | 674841     |
| 1.777 | 19785 | 84417      | 9.49   | 6160  | 662486     | 53.249  | 1     | 674842     |
| 1.876 | 18579 | 102996     | 9.994  | 4331  | 666817     | 56.202  | 2     | 674844     |
| 1.98  | 21197 | 124193     | 10.548 | 3449  | 670266     | 62.607  | 1     | 674845     |
| 2.09  | 19340 | 143533     | 11.133 | 1841  | 672107     | 69.743  | 1     | 674846     |
| 2.205 | 19669 | 163202     | 11.75  | 1233  | 673340     | 86.547  | 1     | 674847     |
| 2.382 | 21268 | 184470     | 12.402 | 569   | 673909     | 113.354 | 1     | 674848     |
| 2.457 | 21670 | 206140     | 13.09  | 378   | 674287     | 133.276 | 1     | 674849     |
| 2.593 | 18694 | 224834     | 13.816 | 186   | 674473     |         |       |            |

Table S3 Particle size distribution of magnesium from particle size analyzer.

| Size  | Count | Cumulative | Size   | Count | Cumulative | Size   | Count | Cumulative |
|-------|-------|------------|--------|-------|------------|--------|-------|------------|
| 0.514 | 3     | 3          | 3.049  | 4685  | 67417      | 18.095 | 4675  | 307005     |
| 0.542 | 4     | 7          | 3.218  | 5055  | 72472      | 19.099 | 4285  | 311290     |
| 0.572 | 3     | 10         | 3.396  | 5184  | 77656      | 20.158 | 4229  | 315519     |
| 0.604 | 4     | 14         | 3.585  | 4710  | 82366      | 21.275 | 3290  | 318809     |
| 0.637 | 3     | 17         | 3.783  | 6004  | 88370      | 22.455 | 3348  | 322157     |
| 0.673 | 4     | 21         | 3.993  | 6524  | 94894      | 23.7   | 2982  | 325139     |
| 0.71  | 4     | 25         | 4.215  | 5512  | 100406     | 25.014 | 2369  | 327508     |
| 0.749 | 8     | 33         | 4.448  | 6851  | 107257     | 26.401 | 1747  | 329255     |
| 0.791 | 6     | 39         | 4.695  | 6100  | 113357     | 27.865 | 1696  | 330951     |
| 0.835 | 4     | 43         | 4.955  | 6293  | 119650     | 29.41  | 1494  | 332445     |
| 0.881 | 12    | 55         | 5.23   | 7852  | 127502     | 31.041 | 1145  | 333590     |
| 0.93  | 16    | 71         | 5.52   | 6627  | 134129     | 32.762 | 896   | 334486     |
| 0.982 | 16    | 87         | 5.826  | 8393  | 142522     | 34.579 | 675   | 335161     |
| 1.036 | 16    | 103        | 6.149  | 7355  | 149877     | 36.497 | 566   | 335727     |
| 1.093 | 26    | 129        | 6.49   | 8802  | 158679     | 38.52  | 485   | 336212     |
| 1.154 | 34    | 163        | 6.85   | 7562  | 166241     | 40.565 | 348   | 336560     |
| 1.218 | 64    | 227        | 7.23   | 8938  | 175179     | 42.911 | 244   | 336804     |
| 1.286 | 138   | 365        | 7.631  | 9216  | 184395     | 45.29  | 169   | 336973     |
| 1.357 | 491   | 856        | 8.054  | 7738  | 192133     | 47.801 | 138   | 337111     |
| 1.432 | 2066  | 2922       | 8.5    | 9264  | 201397     | 50.452 | 89    | 337200     |
| 1.512 | 4542  | 7464       | 8.972  | 9159  | 210556     | 53.249 | 49    | 337249     |
| 1.595 | 4519  | 11983      | 9.469  | 9072  | 219628     | 56.202 | 41    | 337290     |
| 1.684 | 4621  | 16604      | 9.994  | 8834  | 228462     | 59.318 | 26    | 337316     |
| 1.777 | 4914  | 21518      | 10.54  | 10097 | 238559     | 62.607 | 21    | 337337     |
| 1.876 | 4395  | 25913      | 11.133 | 7991  | 246550     | 66.079 | 14    | 337351     |
| 1.98  | 4865  | 30778      | 11.751 | 8944  | 255494     | 69.743 | 5     | 337356     |
| 2.09  | 4207  | 34985      | 12.402 | 7439  | 262933     | 73.61  | 7     | 337363     |
| 2.205 | 4381  | 39366      | 13.09  | 8094  | 271027     | 77.692 | 5     | 337368     |
| 2.328 | 4695  | 44061      | 13.816 | 7301  | 278328     | 82     | 5     | 337373     |
| 2.457 | 4830  | 48891      | 14.582 | 6928  | 285256     | 86.547 | 2     | 337375     |
| 2.593 | 4040  | 52931      | 15.39  | 6186  | 291442     | 91.346 | 1     | 337376     |
| 2.737 | 5186  | 58117      | 16.24  | 5725  | 297167     | 96.411 | 1     | 337377     |
| 2.889 | 4615  | 62732      | 17.145 | 5163  | 302330     |        |       |            |

## Theoretical Maximum Density Calculations

The theoretical maximum densities of the thin sheets and LFA pellets were calculated using Eq. (1), given the masses ( $M$ ) and densities ( $\rho$ ) of Mg, MnO<sub>2</sub> and In used in each sample. The mass of In was varied experimentally, and the masses of Mg and MnO<sub>2</sub> were balanced stoichiometrically per Reaction (1).

$$TMD = \frac{M_{Mg}\rho_{Mg} + M_{MnO_2}\rho_{MnO_2} + M_{In}\rho_{In}}{M_{Mg} + M_{MnO_2} + M_{In}} \quad (1)$$

The percent TMD was calculated for each pressed LFA pellet and pressed thin sheet using the mass and volume ( $V$ ) of each pellet after pressing. This calculation is shown in Eq. (2).

$$\% TMD = \frac{M_{sample}/V_{sample}}{TMD} \quad (2)$$

The custom thin sheet press produced samples 0.635cm wide and 6.985cm in total length, with a full radius on each end. The press was shimmed to a height of 0.889cm, resulting in samples with a volume of 0.387cm<sup>3</sup>. The calculated TMDs, sample masses, resultant densities and %TMDs for the pressed thin sheets used in this study are shown in Table S4. In general, the theoretical maximum density was 70%. As porosity is the compliment of the theoretical maximum density, this corresponds to a porosity of 30% for each of the samples generated in this study.

Table S4. Theoretical maximum density calculations for the thin sheets used to measure flame speeds. In general, the theoretical maximum density was ~70%.

| In wt. %  | TMD  | In vol.%<br>(TMD) | In vol.%<br>(70% TMD) | Mass (g) | Density<br>(g/cm <sup>3</sup> ) | % TMD |
|-----------|------|-------------------|-----------------------|----------|---------------------------------|-------|
| <b>20</b> | 4.54 | 9%                | <b>6%</b>             | 1.2150   | 3.14                            | 69%   |
|           |      |                   |                       | 1.2115   | 3.13                            | 69%   |
| <b>30</b> | 4.89 | 15%               | <b>10%</b>            | 1.3298   | 3.44                            | 70%   |
|           |      |                   |                       | 1.3297   | 3.44                            | 70%   |
| <b>40</b> | 5.23 | 21%               | <b>14%</b>            | 1.4486   | 3.75                            | 72%   |
|           |      |                   |                       | 1.4820   | 3.83                            | 73%   |
| <b>50</b> | 5.58 | 29%               | <b>19%</b>            | 1.5117   | 3.91                            | 70%   |
|           |      |                   |                       | 1.5323   | 3.96                            | 71%   |
| <b>60</b> | 5.93 | 38%               | <b>27%</b>            | 1.6230   | 4.20                            | 71%   |

|  |  |        |      |     |
|--|--|--------|------|-----|
|  |  | 1.6124 | 4.17 | 70% |
|--|--|--------|------|-----|

The die used to press pellets for the LFA was 12.5mm in diameter and shimmed to 1.7mm, resulting in pellets with a volume of 0.212cm<sup>3</sup>. The TMDs, masses, densities and %TMDs for the pressed thin sheets used in this study are shown in Table S5.

Table S5. Theoretical maximum density calculations for the pellets used in the LFA. In general, the theoretical maximum density was slightly less than 70%

| In wt. %  | TMD  | In vol.%<br>(TMD) | In vol.%<br>(70% TMD) | Mass (g) | Density<br>(g/cm <sup>3</sup> ) | % TMD |
|-----------|------|-------------------|-----------------------|----------|---------------------------------|-------|
| <b>0</b>  | 3.85 | 0%                | 0%                    | 0.5146   | 2.43                            | 63%   |
|           |      |                   |                       | 0.5287   | 2.49                            | 65%   |
|           |      |                   |                       | 0.5263   | 2.48                            | 65%   |
| <b>20</b> | 4.54 | 9%                | 6%                    | 0.6429   | 3.03                            | 67%   |
|           |      |                   |                       | 0.6268   | 2.96                            | 65%   |
|           |      |                   |                       | 0.6475   | 3.05                            | 67%   |
| <b>30</b> | 4.89 | 15%               | 10%                   | 0.6992   | 3.30                            | 68%   |
|           |      |                   |                       | 0.6993   | 3.30                            | 68%   |
|           |      |                   |                       | 0.6907   | 3.26                            | 67%   |
| <b>40</b> | 5.23 | 21%               | 14%                   | 0.7393   | 3.49                            | 67%   |
|           |      |                   |                       | 0.7452   | 3.52                            | 67%   |
|           |      |                   |                       | 0.7946   | 3.75                            | 67%   |
| <b>50</b> | 5.58 | 29%               | 19%                   | 0.7934   | 3.74                            | 67%   |
|           |      |                   |                       | 0.7777   | 3.67                            | 66%   |
